# Supplementary material for: The chemical structure and immunomodulatory activity of an exopolysaccharide produced by Morchella esculenta under submerged fermentation
Source: Royal Society of Chemistry journal article supplement (doi:10.1039/d1fo01683k), 2021-01-01
Supplement: d1fo01683k1.pdf [file d1fo01683k1.pdf]

Supplementary Materials

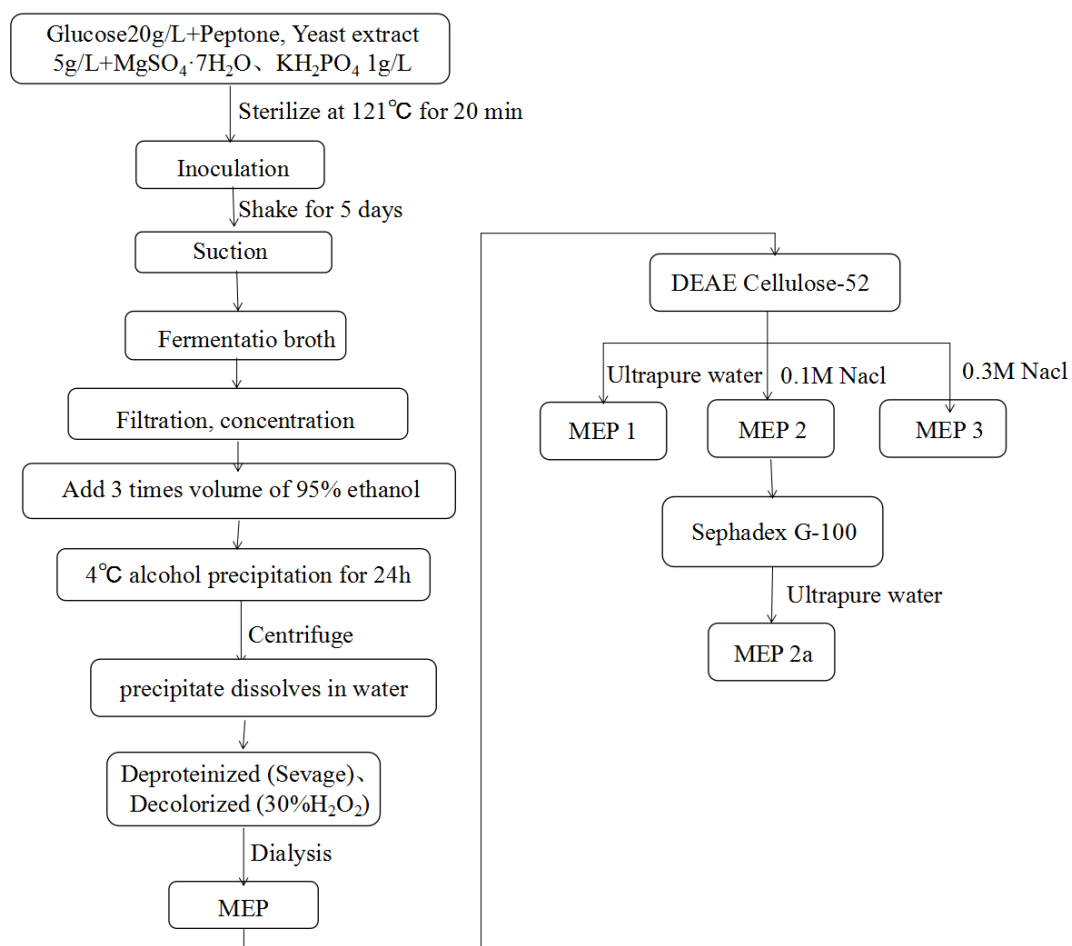

Figure S1 Submerged fermentation conditions of *Morchella esculenta* and extraction, purification process of the exopolysaccharide MEP 2a

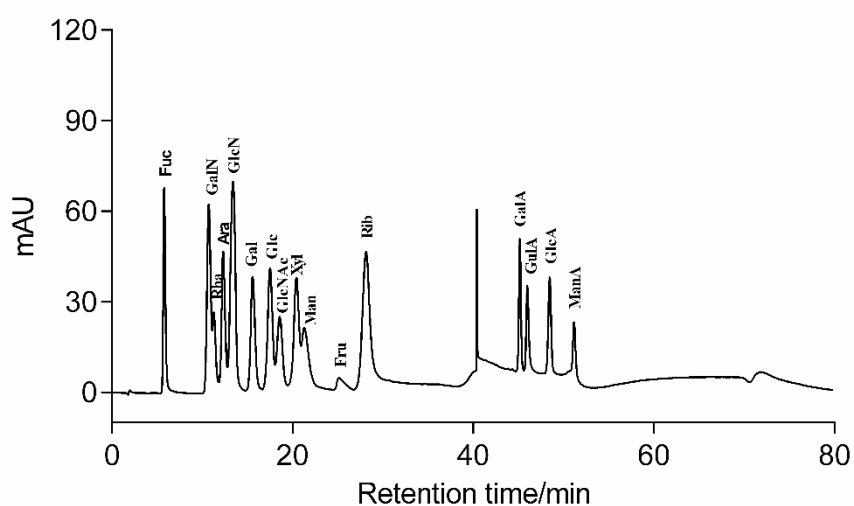

Figure S2 HPLC chromatogram of 16 standard monosaccharide samples (fucose, rhamnose, arabinose, galactose, glucose, xylose, mannose, fructose, ribose, galacturonic acid, glucuronic acid, galactosamine hydrochloride, glucosamine hydrochloride, N-acetyl-D glucosamine, guluronic acid, mannuronic acid).

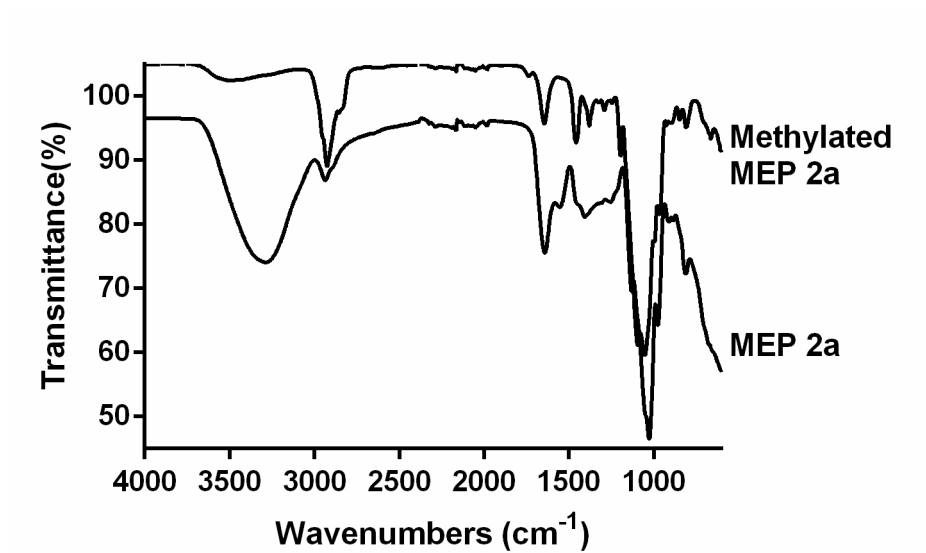

Figure S3 FT-IR spectra of methylated and original MEP 2a.

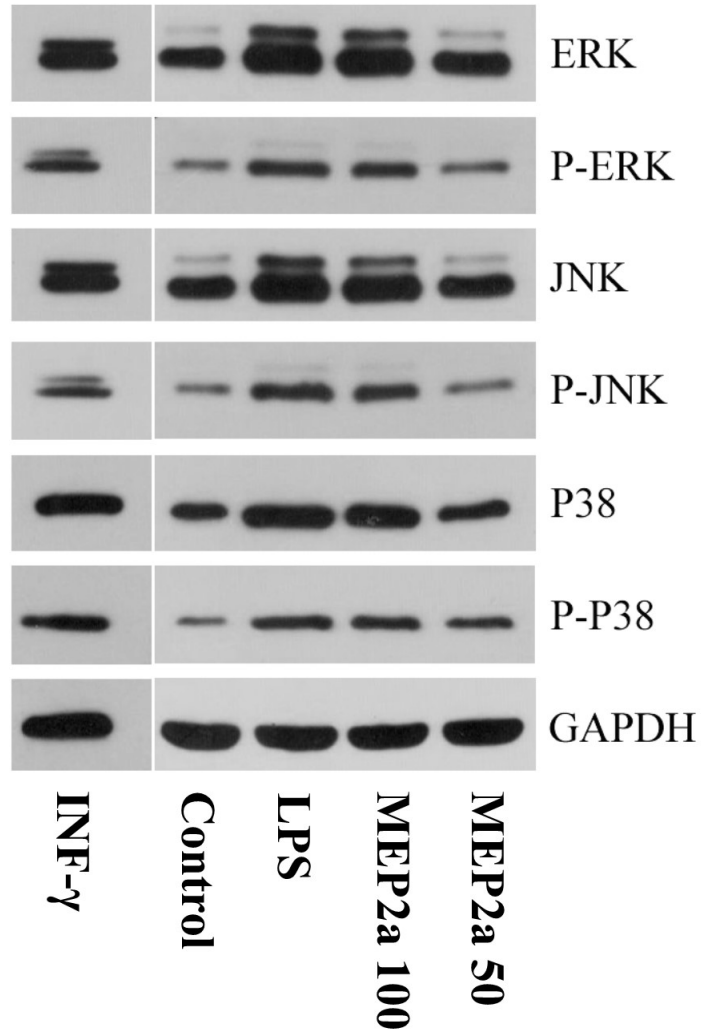

Figure S4 Western blot result of ERK, p-ERK, JNK, p-JNK, p38 and p-p38 in macrophage RAW264.7 treated by INF- $\gamma$ , ultrapure water (control), LPS, MEP 2a at the concentration of 50  $\mu\text{g}/\text{mL}$  (MEP 2a 50) and MEP 2a at the concentration of 100  $\mu\text{g}/\text{mL}$  (MEP 2a 100).
